# Supplementary material
Source: PubMed Central journal article supplement (PMC3883579)
Supplement: NIHMS524100-supplement-supp_data.pdf [file NIHMS524100-supplement-supp_data.pdf]

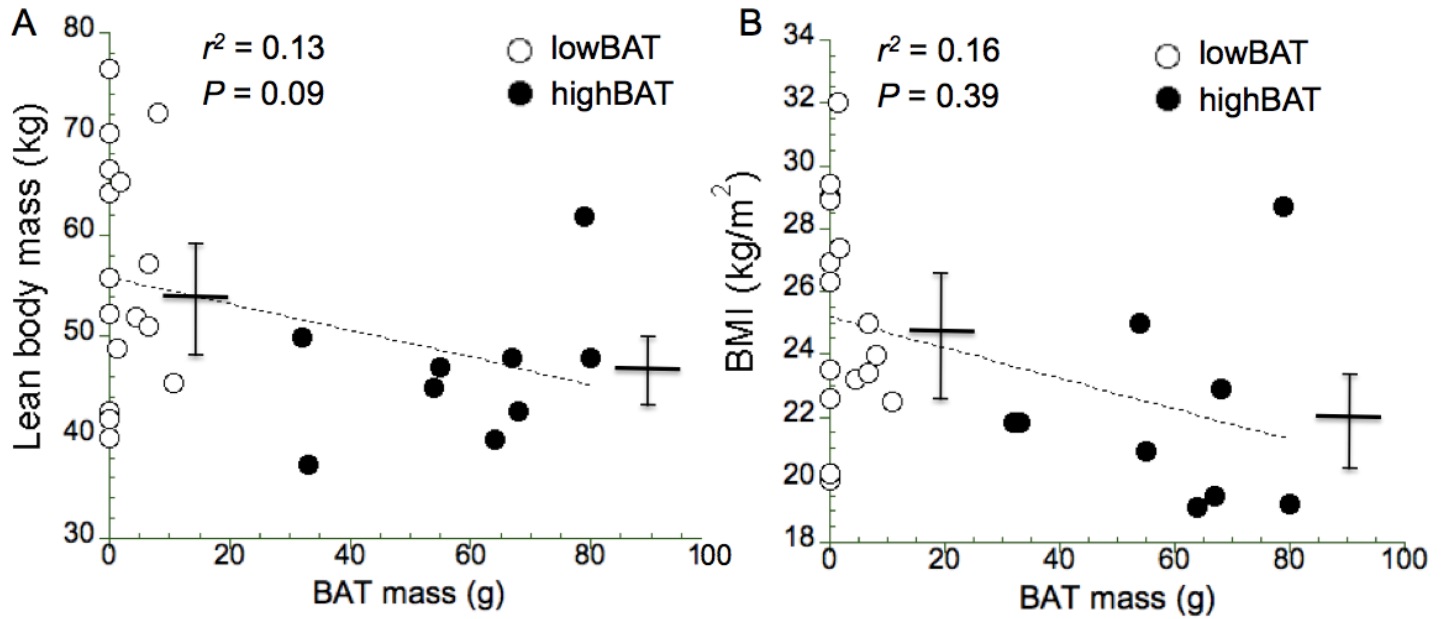

**Supplemental Figure 1.** Relationship between BAT mass and lean body mass (LBM), as well as between BAT mass and the body mass index (BMI). **(A)** The LBM was slightly higher ( $p = 0.09$ ) in the lowBAT group (open circles) as compared to the highBAT group (full circles), most likely due to the higher presence of males in the lowBAT group. **(B)** Similarly, the BMI was also slightly higher in the lowBAT group ( $p = 0.39$ ), although in both cases the difference was not statistically different.

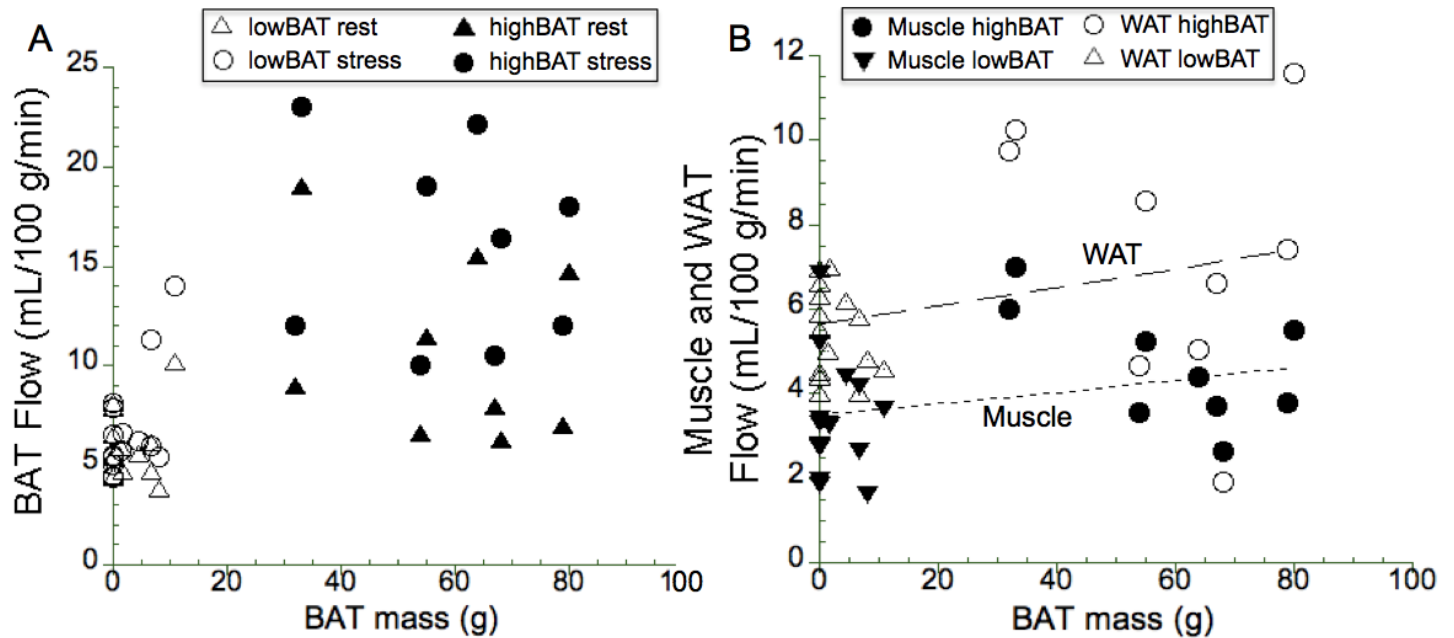

**Supplemental Figure 2.** Relationship between **(A)** BAT mass and blood flow in BAT as well as between **(B)** BAT mass and muscle/WAT. **(A)** Blood flow in BAT was significantly higher in the highBAT group at both rest (full triangles) and cold stress (full circles) as compared to rest (open triangles) and stress (open circles) flow values in the lowBAT group. **(B)** Averaged rest/stress blood flow values in WAT were significantly higher in the highBAT as compared to the lowBAT group (open circles and triangles), but did not differ in muscle tissue (full circles and triangles) between the two groups.
